# Supplementary material
Source: PubMed Central journal article supplement (PMC390329)

## Supplementary Materials

### Figure S1. TOCSY spectrum of TrxR and GPX SECIS

The spectra were recorded at 30°C in D<sub>2</sub>O.

40 ms mixing time, 600 MHz D<sub>2</sub>O. Anomeric to 2'/3' region. A small number of strong resonances is consistent with only a few residues having a significant H1'-H2' coupling or narrow lines.

A. TrxR SECIS

B. GPX SECIS

### Figure S2. <sup>31</sup>P NMR spectra

Spectra were recorded at 14.1 T on a Varian Inova spectrometer using a 5 mm switchable X pfg probe. Spectra were recorded with an acquisition time of 1.5 s, a relaxation delay of 3.5 sec with proton Waltz decoupling centered at 4.6 ppm during the acquisition, but not during the delay to reduce heating effects.

Figure S1

A.

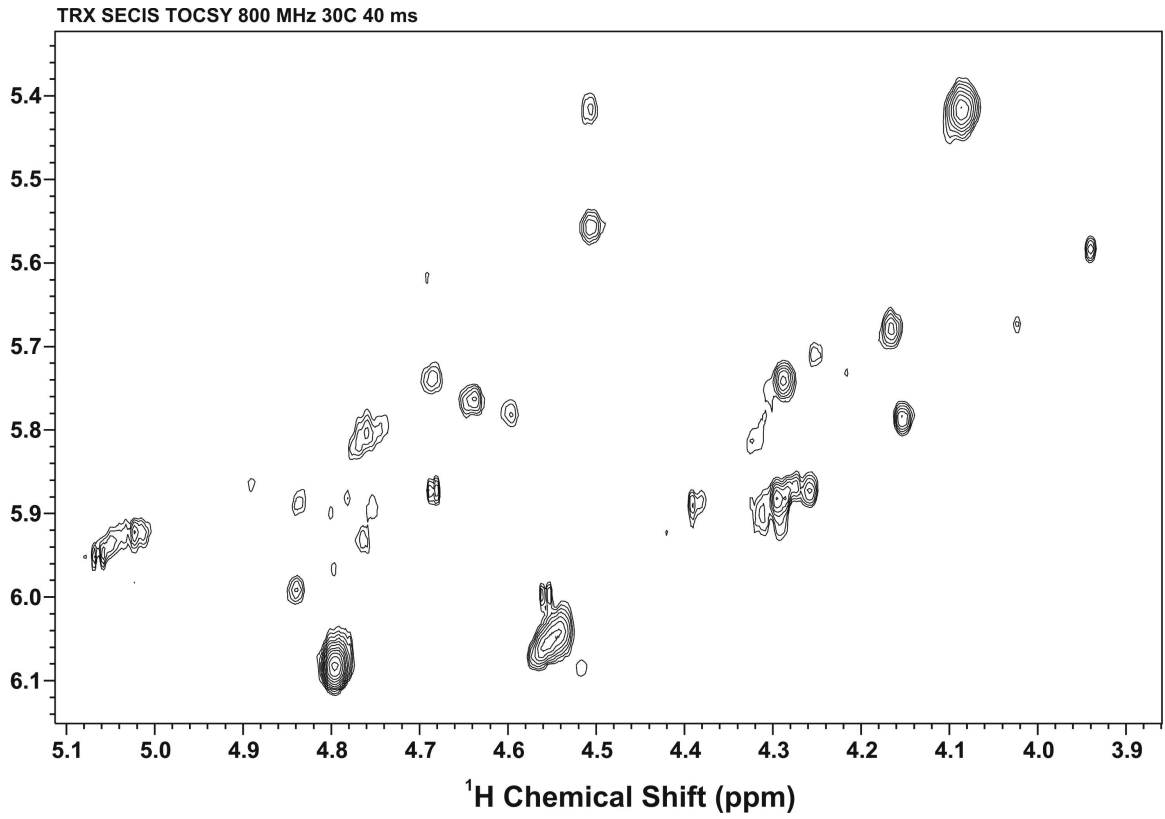

B.

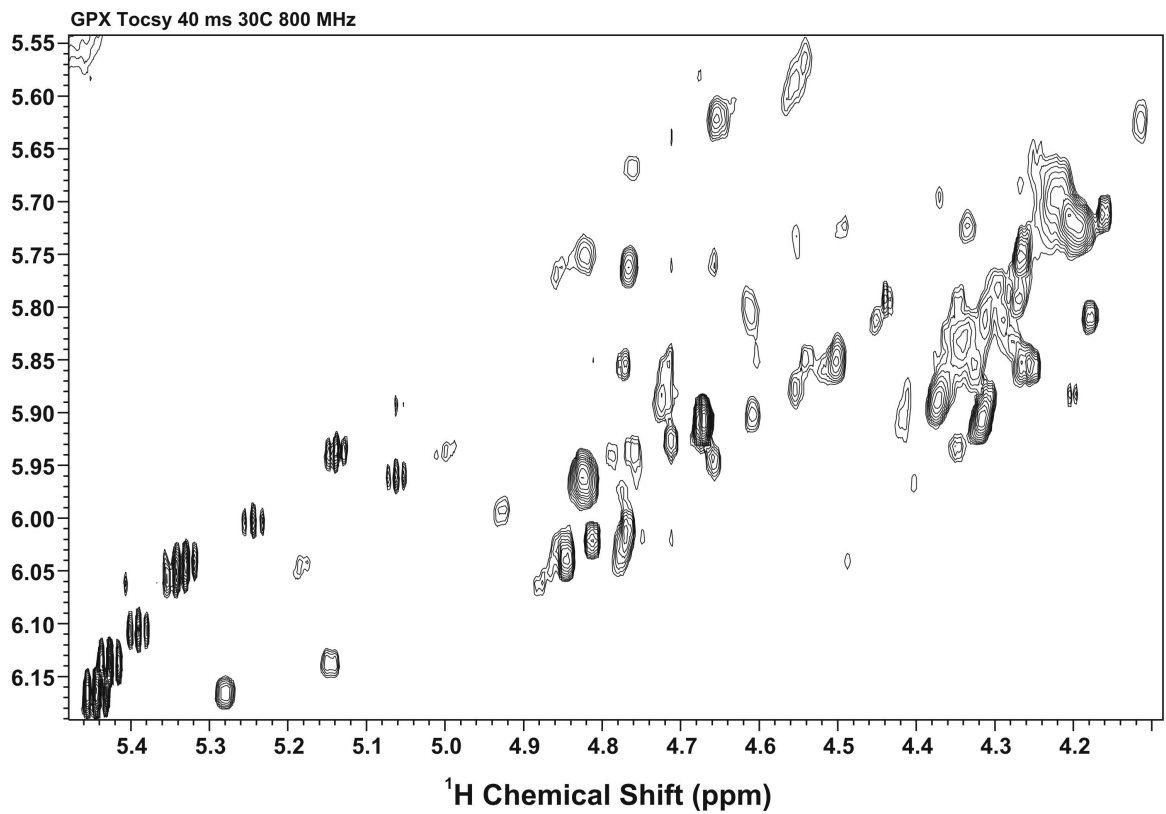

Figure S2

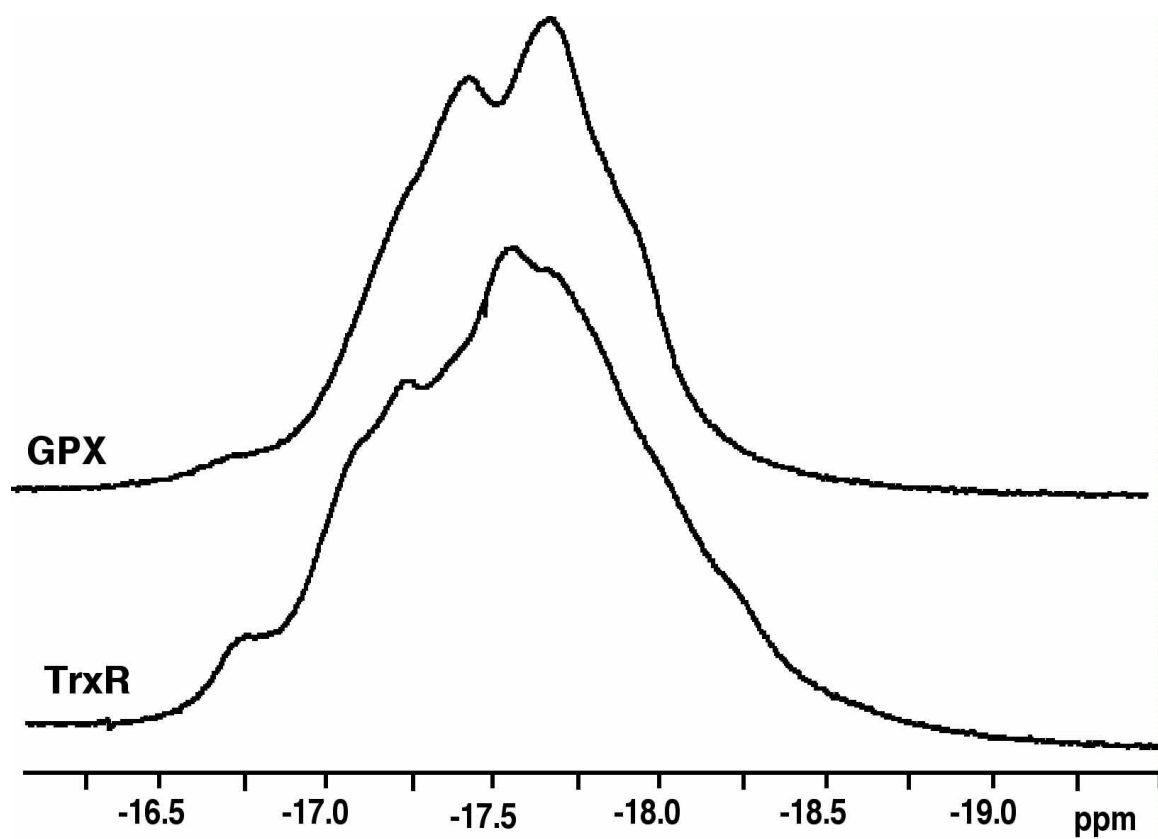

Supplement: nar_32_5_1746__1.pdf [file nar_32_5_1746__1.pdf]
